# Supplementary material for: Harmonising palliative care: a national survey to evaluate the knowledge and attitude of emergency physicians towards palliative care in Kuwait
Source: HighWire-hosted journal article supplement (doi:10.1136/bmjspcare-2019-002141), 2020-11-09
Supplement: bmjspcare-2019-002141supp002_data_supplement.pdf [file bmjspcare-2019-002141supp002_data_supplement.pdf]

**Table S1: Comparison between the emergency physicians' characteristics working in different hospitals in Kuwait**

|                          | Hospital (A)<br>(N=18) | Hospital (B)<br>(N=14) | Hospital (C)<br>(N=15) | Hospital (D)<br>(N=17) | Hospital (E)<br>(N=20) | Hospital (F)<br>(N=20) | P value* |
|--------------------------|------------------------|------------------------|------------------------|------------------------|------------------------|------------------------|----------|
| Age                      | 40.11(±11.6)           | 39.64(±10.4)           | 43.11(±8.8)            | 34.25(±5.2)            | 39.4(±9.8)             | 36.95(±9.0)            | 0.151    |
| Sex                      |                        |                        |                        |                        |                        |                        |          |
| • Males                  | 14(77.8%)              | 13(92.9%)              | 14(93.3%)              | 17(100.0%)             | 16(80.0%)              | 16(80.0%)              | 0.249**  |
| • Females                | 4(22.2%)               | 1(7.1%)                | 1(6.7%)                | 0                      | 4(20.0%)               | 4(20.0%)               |          |
| Nationality              |                        |                        |                        |                        |                        |                        |          |
| • Kuwaiti                | 5(27.8%)               | 2(14.3%)               | 2(13.3%)               | 1(5.9%)                | 5(25.0%)               | 6(30.0%)               | 0.417**  |
| • Others                 | 13(72.2%)              | 12(85.7%)              | 13(86.7%)              | 16(94.1%)              | 15(75.0%)              | 14(70.0%)              |          |
| Qualification            |                        |                        |                        |                        |                        |                        |          |
| • MBBS                   | 4(22.2%)               | 2(14.3%)               | 1(6.7%)                | 3(17.6%)               | 7(35.0%)               | 11(55.0%)              | 0.020**  |
| • Master                 | 12(66.7%)              | 8(57.1%)               | 8(53.3%)               | 14(82.4%)              | 12(60.0%)              | 7(35.0%)               |          |
| • MD                     | 2(11.1%)               | 4(28.6%)               | 6(40.0%)               | 0                      | 1(5.0%)                | 2(10.0%)               |          |
| Position                 |                        |                        |                        |                        |                        |                        |          |
| • Assistant registrar    | 2(11.1%)               | 0                      | 0                      | 1(5.0%)                | 1(5.0%)                | 2(10.0%)               | 0.151**  |
| • Registrar              | 14(77.8%)              | 10(71.4%)              | 11(73.3%)              | 16(94.1%)              | 18(90.0%)              | 17(85.0%)              |          |
| • Senior registrar       | 1(5.6%)                | 4(28.6%)               | 1(6.7%)                | 0                      | 1(5.0%)                | 1(5.0%)                |          |
| • Specialist/ Consultant | 1(5.6%)                | 0                      | 3(20%)                 | 0                      | 0                      | 0                      |          |
| Specialty                |                        |                        |                        |                        |                        |                        |          |
| • Emergency Medicine     | 8(44.4%)               | 12(85.7%)              | 8(53.3%)               | 10(58.8%)              | 16(80.0%)              | 14(70.0%)              | 0.007**  |
| • Internal Medicine      | 5(27.8%)               | 1(7.1%)                | 2(13.3%)               | 2(11.8%)               | 1(5.0%)                | 1(5.0%)                |          |
| • Surgery                | 0                      | 0                      | 3(20.0%)               | 1(5.9%)                | 3(15.0%)               | 3(15.0%)               |          |
| • Others                 | 5(27.8%)               | 1(7.1%)                | 2(13.3%)               | 4(23.5%)               | 0                      | 2(10.0%)               |          |
| Experience yrs)          | 14.11(±9.6)            | 14.79(±10.5)           | 17.47(±8.5)            | 9.38(±5.1)             | 15.05(±10.3)           | 10.9(±8.4)             | 0.118    |
| Attitude                 |                        |                        |                        |                        |                        |                        |          |
| • Positive attitude      | 7(38.9%)               | 7(50.0%)               | 5(33.3%)               | 4(23.5%)               | 5(25.0%)               | 6(30.0%)               | 0.832**  |
| • Negative attitude      | 2(11.1%)               | 2(14.3%)               | 4(26.7%)               | 5(29.4%)               | 3(15.0%)               | 5(25.0%)               |          |
| • Not sure               | 9(50.0%)               | 5(35.7%)               | 6(40.0%)               | 8(47.1%)               | 12(60.0%)              | 9(45.0%)               |          |
| Knowledge                |                        |                        |                        |                        |                        |                        |          |
| Total score              | 4.78(2.25)             | 6.0(2.51)              | 6.07(2.81)             | 6.12(2.48)             | 5.65(2.43)             | 5.6(2.46)              | 0.623    |
| • Good knowledge         | 1(5.6%)                | 3(21.4%)               | 4(26.7%)               | 3(17.6%)               | 3(15.0%)               | 2(10.0%)               | 0.877**  |
| • Fair knowledge         | 6(33.3%)               | 4(28.6%)               | 6(40.0%)               | 7(41.2%)               | 7(35.0%)               | 7(35.0%)               |          |
| • Poor knowledge         | 11(61.1%)              | 7(50.0%)               | 5(33.3%)               | 7(41.2%)               | 10(50.0%)              | 11(55.0%)              |          |

\* P value &lt; 0.05 is significant \*\*; Fisher Exact

Hospital (A): Mubarak AlKabeer, Hospital (B): AlAdan, Hospital, (C): AlSabah, Hospital (D): Al-Jahra, Hospital (E): Al-Farawanyia, Hospital (F): Al-Amiri
